# Supplementary material for: The Association of Prostate Cancer and Urinary Tract Infections: A New Perspective of Prostate Cancer Pathogenesis
Source: MDPI journal article supplement (doi:10.3390/medicina59030483), 2023-03-01
Supplement: s1 [file s1]

**Table S1.** Baseline characteristics of the patients with or without prostate cancer after propensity score matched.

| Variables                    | Without prostate cancer<br>N=2548 |      | With prostate cancer<br>N=2548 |      | p-value |
|------------------------------|-----------------------------------|------|--------------------------------|------|---------|
|                              | n                                 | %    | n                              | %    |         |
| Age, years                   |                                   |      |                                |      | 0.97    |
| 20-64                        | 473                               | 18.6 | 474                            | 18.6 |         |
| ≥65                          | 2075                              | 81.4 | 2074                           | 81.4 |         |
| Mean±SD <sup>a</sup>         |                                   |      |                                |      |         |
| Comorbidity                  |                                   |      |                                |      |         |
| Hypertension                 | 1617                              | 63.5 | 1623                           | 63.7 | 0.86    |
| Diabetes                     | 667                               | 26.2 | 656                            | 25.8 | 0.73    |
| Hyperlipidemia               | 906                               | 35.6 | 906                            | 35.6 | 0.99    |
| COPD                         | 702                               | 27.6 | 718                            | 28.2 | 0.62    |
| CKD                          | 341                               | 13.4 | 356                            | 14.0 | 0.54    |
| Treatments                   |                                   |      |                                |      |         |
| Radiotherapy                 |                                   |      | 1025                           | 40.2 |         |
| Chemical therapy             |                                   |      | 338                            | 13.3 |         |
| Radical                      |                                   |      | 1913                           | 75.1 |         |
| prostatectomy                |                                   |      |                                |      |         |
| Androgen deprivation therapy |                                   |      | 1128                           | 44.3 |         |

<sup>a</sup> t-test; Chi-square test.

Abbreviations: COPD, chronic obstructive pulmonary disease; CKD, chronic kidney disease

**Table S2.** Comparisons of the incidence of urinary tract infections, prostatitis, cystitis, and pyelonephritis between the patients with and without prostate cancer after propensity score matched.

| Variable                | Without prostate cancer |             |      | With prostate cancer |             |      | Crude            |         | Adjusted         |         |
|-------------------------|-------------------------|-------------|------|----------------------|-------------|------|------------------|---------|------------------|---------|
|                         | Event                   | Person-Year | IR   | Event                | Person-Year | IR   | HR (95% CI)      | P-value | HR (95% CI)      | P-value |
| Overall                 | 534                     | 15013       | 35.6 | 715                  | 12450       | 57.4 | 1.59(1.42, 1.78) | <0.001  | 1.58(1.41, 1.77) | <0.001  |
| Urinary tract infection | 524                     | 15052       | 34.8 | 693                  | 12534       | 55.3 | 1.56(1.39, 1.75) | <0.001  | 1.55(1.39, 1.74) | <0.001  |
| Recurrent UTIs          | 302                     |             | 20.1 | 405                  |             | 32.3 | 1.58(1.36, 1.84) | <0.001  | 1.57(1.35, 1.83) | <0.001  |
| Prostatitis             | 11                      | 17144       | 0.64 | 20                   | 14899       | 1.34 | 2.10(1.01, 4.38) | 0.048   | 2.10(1.00, 4.38) | 0.049   |
| Cystitis                | 12                      | 17124       | 0.70 | 37                   | 14799       | 2.50 | 3.60(1.87, 6.90) | 0.001   | 3.57(1.86, 6.86) | 0.001   |
| Pyelonephritis          | 19                      | 17094       | 1.11 | 38                   | 14897       | 2.55 | 2.33(1.34, 4.03) | 0.003   | 2.29(1.32, 3.97) | 0.003   |

Abbreviations: IR, incidence rate, per 1000 person-years; HR, hazard ratio; CI, confidence interval. Adjusted HR: adjusted for age, sex, and comorbidities in Cox proportional hazards regression.

**Table S3.** Cox proportional hazard regression analysis for the risk of urinary tract infection with interaction of Radiotherapy and Androgen deprivation therapy among prostate cancer patients.

| Radiotherapy | Androgen deprivation therapy | N    | Event | IR   | Crude HR (95% CI) | Adjusted HR (95% CI) |
|--------------|------------------------------|------|-------|------|-------------------|----------------------|
| No           | No                           | 1043 | 353   | 69.5 | 1(Ref)            | 1(Ref)               |
| Yes          | No                           | 497  | 152   | 50.1 | 0.74(0.61, 0.90)  | 0.71(0.59, 0.86)     |
| No           | Yes                          | 606  | 160   | 61.0 | 0.85(0.70, 1.02)  | 0.84(0.70, 1.02)     |
| Yes          | Yes                          | 609  | 119   | 43.0 | 0.60(0.49, 0.74)  | 0.61(0.49, 0.75)     |

HR, hazard ratio; CI, confidence interval; Adjusted HR: adjusted for age, sex, comorbidities, and other medications in Cox proportional hazards regression; P for interaction=0.78
